# Supplementary material for: Lipoic acid-mediated oral drug delivery system utilizing changes on cell surface thiol expression for the treatment of diabetes and inflammatory diseases
Source: Royal Society of Chemistry journal article supplement (doi:10.1039/d3tb02899b), 2024-01-01
Supplement: d3tb02899b1.pdf [file d3tb02899b1.pdf]

## Supplementary Material

**Title: Lipoic acid-mediated oral drug delivery system utilizing changes on cell surface thiol expression for the treatment of diabetes and inflammatory disease**

Licheng Wu<sup>a</sup>, Liyun Xing<sup>a</sup>, Ruinan Wu<sup>a</sup>, Xiaoxing Fan<sup>a</sup>, Mingjie Ni<sup>a</sup>, Xin Xiao<sup>a</sup>, Zhou Zhou<sup>a</sup>, Lian Li<sup>a</sup>, Jingyuan Wen<sup>b</sup>, Yuan Huang<sup>\*a</sup>

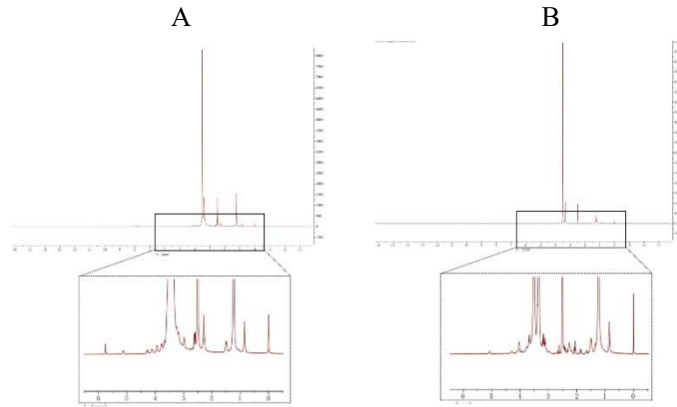

Figure S1. Proton nuclear magnetic resonance spectroscopy of DSPE-PEG-NH<sub>2</sub> (A) and DSPE-PEG-LA (B).

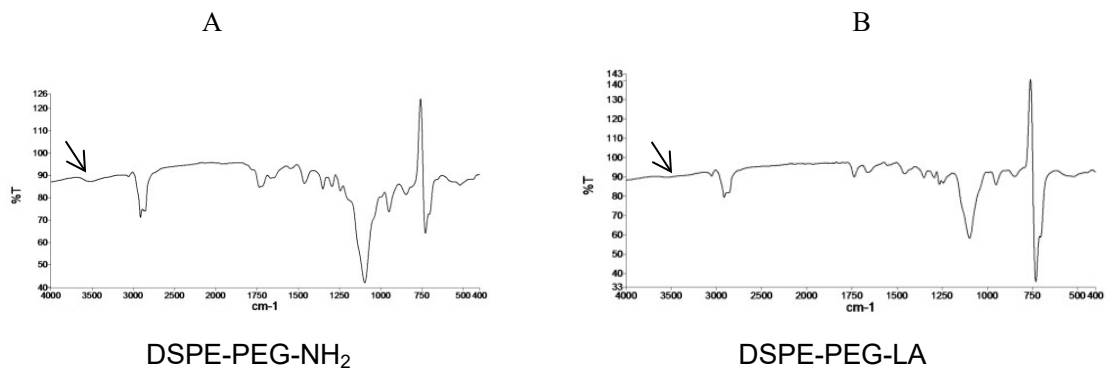

Figure S2. Infrared spectrum DSPE-PEG-NH<sub>2</sub> (A) and DSPE-PEG-LA(B).

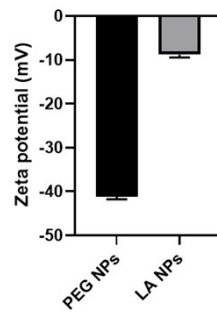

Fig. S3. The zeta potential of PEG NPs and LA NPs.

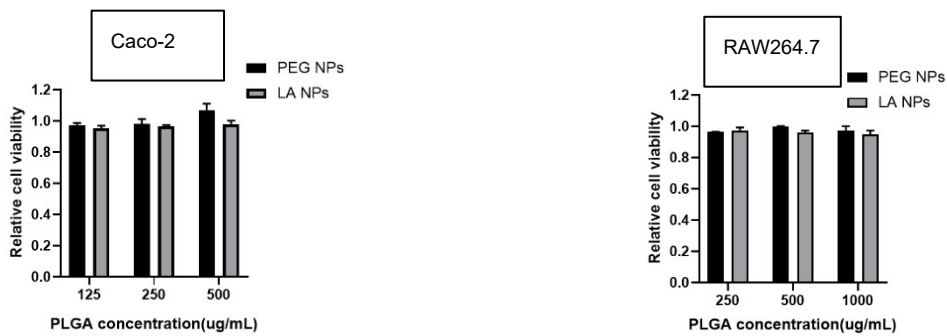

Figure S4. Toxicity of blank NPs on Caco-2 cells and RAW264.7 cells.

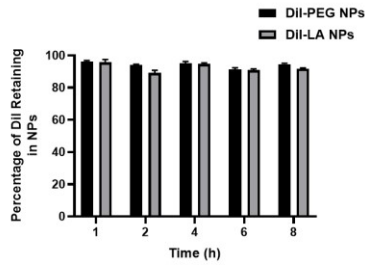

Figure S5. Cumulative amounts of DiI released from DiI-PEG NPs and DiI-LA NPs in PBS (pH 6.8) for 8 h.

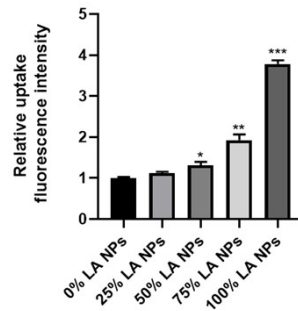

Figure S6. Uptake of LA NPs with different LA modification ratios on Caco-2 cells.

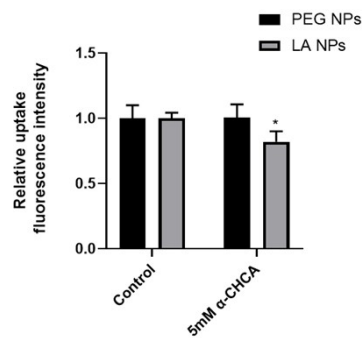

Figure S7. Effect of a broad-spectrum inhibitor of monocarboxylic acid transporter,  $\alpha$ -cyanocinnamic acid on the uptake of NPs on Caco-2 cells.

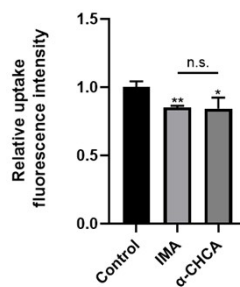

Figure S8. The impact of the thiol oxidant IMA or the monocarboxylate transporter inhibitor  $\alpha$ -CHCA on the uptake of LA NPs on Caco-2 cells.

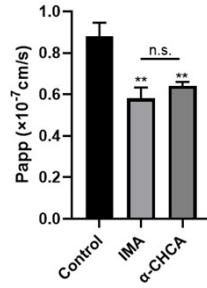

Figure S9. The impact of the thiol oxidant IMA or the monocarboxylate transporter inhibitor  $\alpha$ -CHCA on the transcytosis of LA NPs on Caco-2 cells.

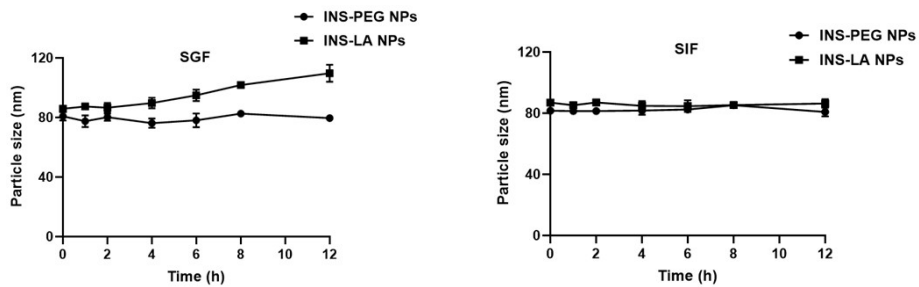

Figure S10. Size change of INS-PEG NPs and INS-LA NPs after incubation with SGF (pH 1.2), SIF (pH 6.8) within 12 h.

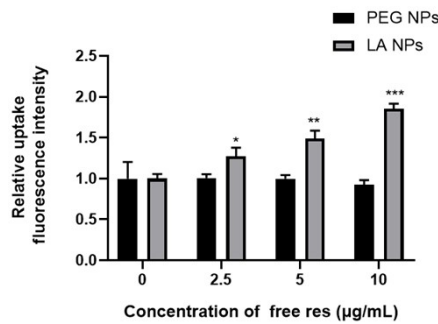

Figure S11. Effect of different concentrations of free resveratrol on the uptake of NPs on RAW264.7 cells.

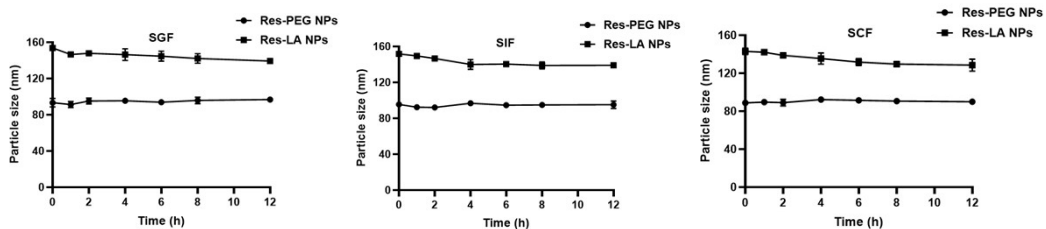

Figure S12. Size change of Res-PEG NPs and Res-LA NPs after incubation with SGF (pH 1.2), SIF (pH 6.8), SCF (pH 7.8) within 12 h.

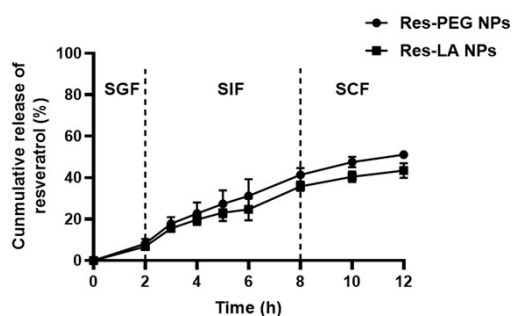

Figure S13. Cumulative amounts of Res released from Res-PEG NPs and Res-LA NPs in SGF (pH 1.2, without enzymes), SIF (pH 6.8, without enzyme) and SCF (pH 7.8, without enzyme).

| Parallel group                                                   | Group 1          | Group 2 | Group 3 |
|------------------------------------------------------------------|------------------|---------|---------|
| Actual amino concentration of DSPE-PEG-NH <sub>2</sub> (mg/mL)   | 0.329            | 0.322   | 0.308   |
| Percentage content of DSPE-PEG-LA (w/w)                          | 67.1%            | 67.8%   | 69.2%   |
| Average percentage content of DSPE-PEG-LA ( Mean $\pm$ SD) (w/w) | 68.0 $\pm$ 0.87% |         |         |

Table S1. Indirect determination of the content of DSPE-PEG-LA in the obtained product by ninhydrin method.

| Samples     | Size(nm)          | PDI             | Zeta potential (mV) | EE%              | DL%              |
|-------------|-------------------|-----------------|---------------------|------------------|------------------|
| INS-PEG NPs | 91.49 $\pm$ 1.61  | 0.27 $\pm$ 0.02 | -24.02 $\pm$ 0.29   | 45.71 $\pm$ 1.54 | 9.95 $\pm$ 0.20  |
| INS-LA NPs  | 92.68 $\pm$ 2.90  | 0.28 $\pm$ 0.01 | -35.33 $\pm$ 2.24   | 43.59 $\pm$ 0.26 | 10.54 $\pm$ 0.34 |
| RES-PEG NPs | 107.83 $\pm$ 2.37 | 0.28 $\pm$ 0.01 | -43.90 $\pm$ 0.54   | 51.91 $\pm$ 1.02 | 6.05 $\pm$ 1.09  |
| RES-LA NPs  | 150.47 $\pm$ 1.15 | 0.24 $\pm$ 0.01 | -11.30 $\pm$ 0.86   | 52.57 $\pm$ 1.59 | 5.93 $\pm$ 0.28  |

Table S2. Size, PDI, zeta potential, encapsulation efficiency and drug loading of insulin-loaded NPs and resveratrol-loaded NPs.

| count scores | weight loss (%) | fecal character  | blood in stool |
|--------------|-----------------|------------------|----------------|
| 0            | none            | normal           | negative       |
| 1            | 1-5             |                  | +              |
| 2            | 6-10            | semi-loose stool | ++             |
| 3            | 10-20           |                  | +++            |
| 4            | >20             | loose stools     | ++++           |

Table S3. Disease activity index (DAI) scoring criteria for colitis mice model.
